# Supplementary material
Source: HighWire-hosted journal article supplement (https://www.cmajopen.ca/highwire/filestream/89948/field_highwire_adjunct_files/0/open-2022-0104-1-at.pdf)
Supplement: open-2022-0104-1-at.pdf [file open-2022-0104-1-at.pdf]

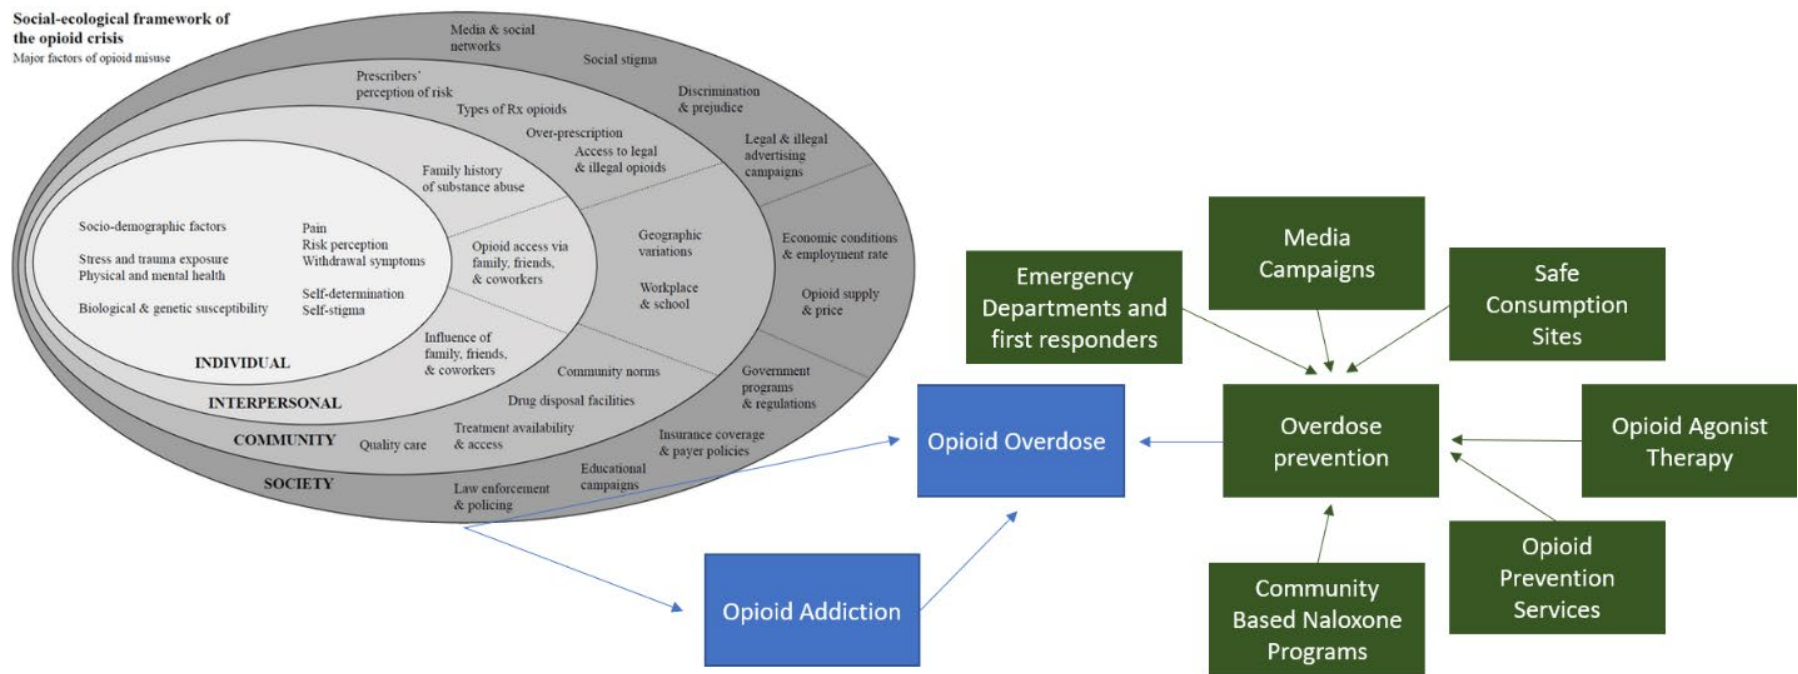

Supplemental Figure 1. Program Theory for Overdose Prevention Services Using the Social-ecological framework of the opioid crisis
